# Supplementary material for: Salen Mn(iii) immobilized onto ZnPS-PVPA modified by 1,2,3-triazole as efficient and reusable catalysts for asymmetric epoxidation of olefins
Source: Royal Society of Chemistry journal article supplement (doi:10.1039/c3ra42076k), 2013-01-01
Supplement: c3ra42076k.pdf [file c3ra42076k.pdf]

## Supporting Information

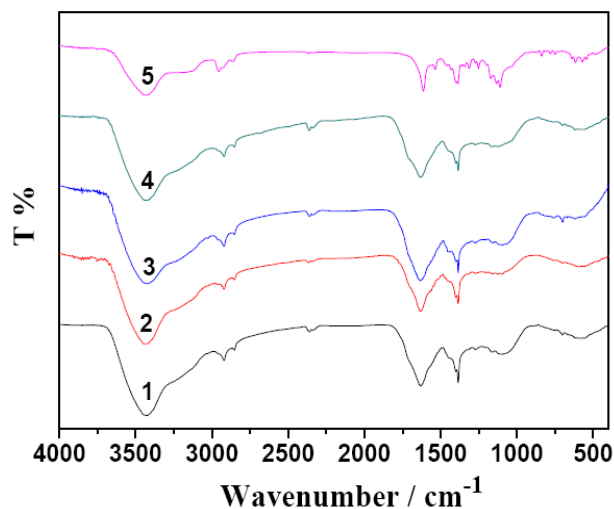

Fig. S1 FT-IR spectra of (1) **5a**; (2) **5b**; (3) **5c**; (4) **5d**; (5) the neat chiral salen Mn(III)Cl

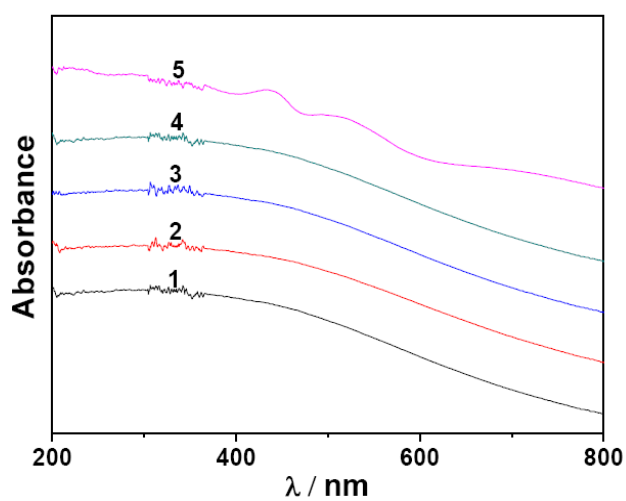

Fig. S2 UV-vis spectra of (1) **5a**; (2) **5b**; (3) **5c**; (4) **5d**; (5) chiral salen Mn (III)Cl.

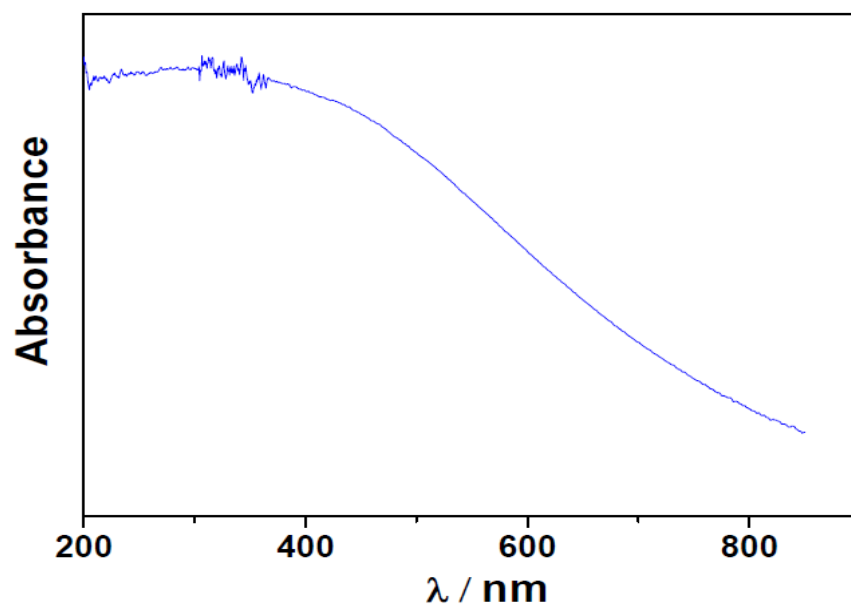

UV-vis spectra of **5d**

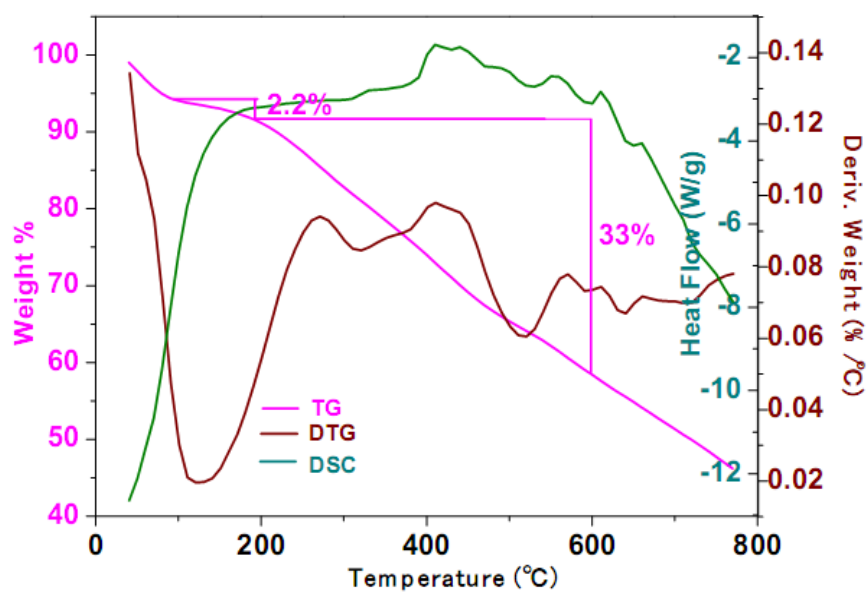

Fig. S3 TG curves of the catalyst **5d** (B).

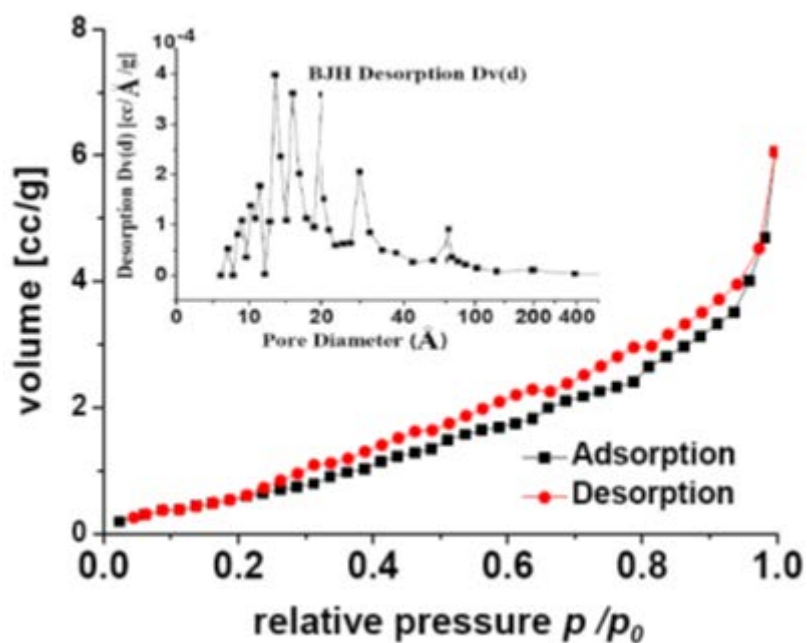

**Fig. S4** The nitrogen adsorption-desorption isotherm and pore distribution of the supported catalyst **6d**.

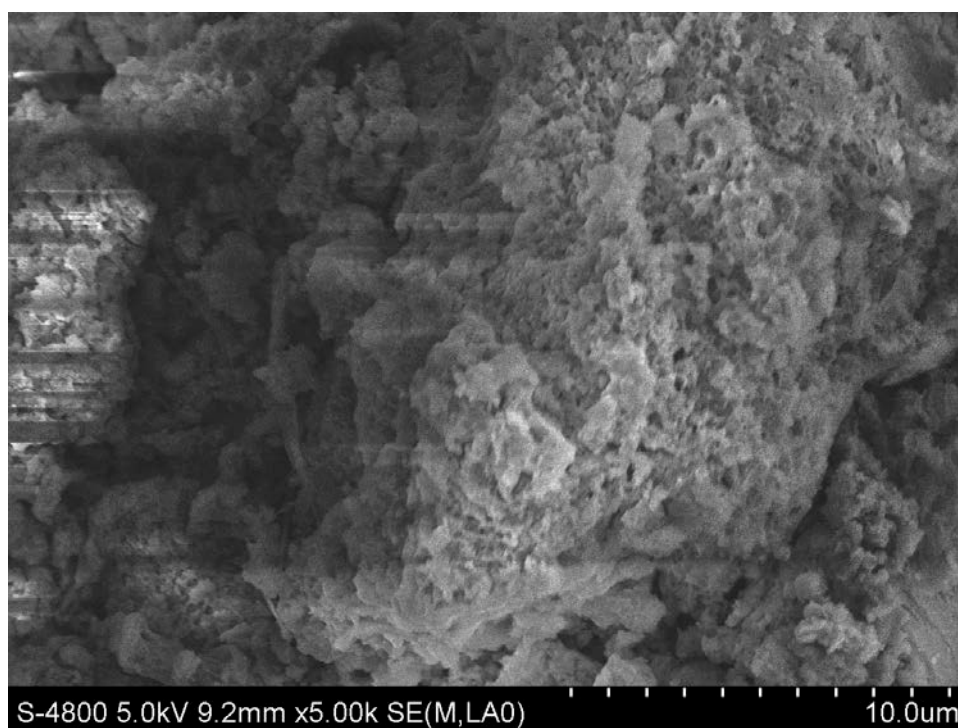

**Fig. S5** SEM images of **5d**.

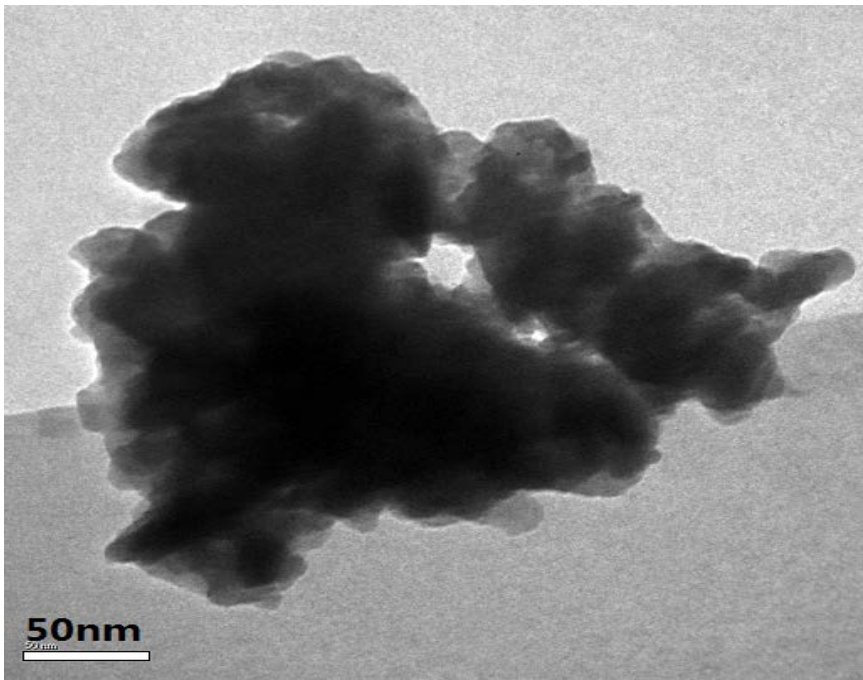

**Fig. S6** Caption TEM photograph of the heterogeneous catalyst **5d**.

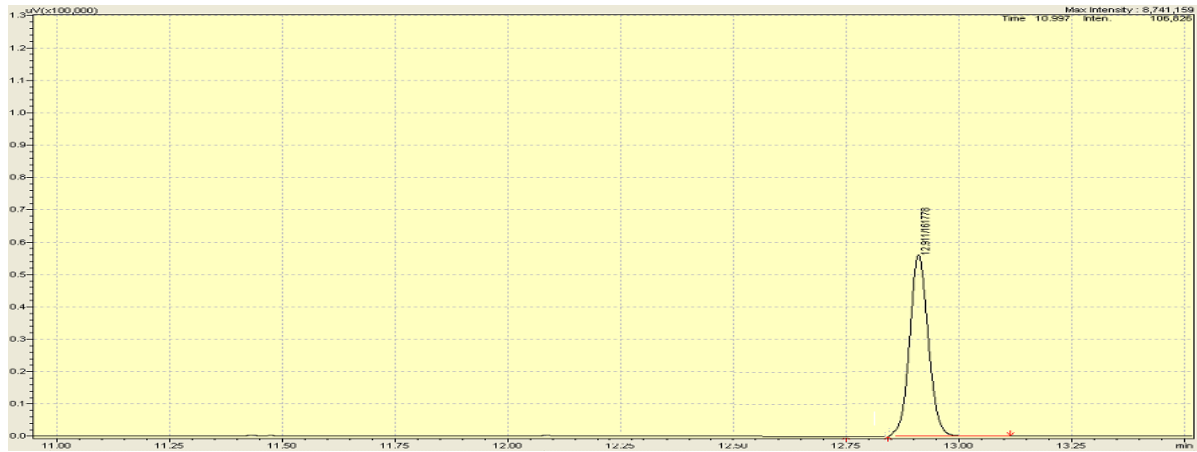

**Entry 5 in Table 2**

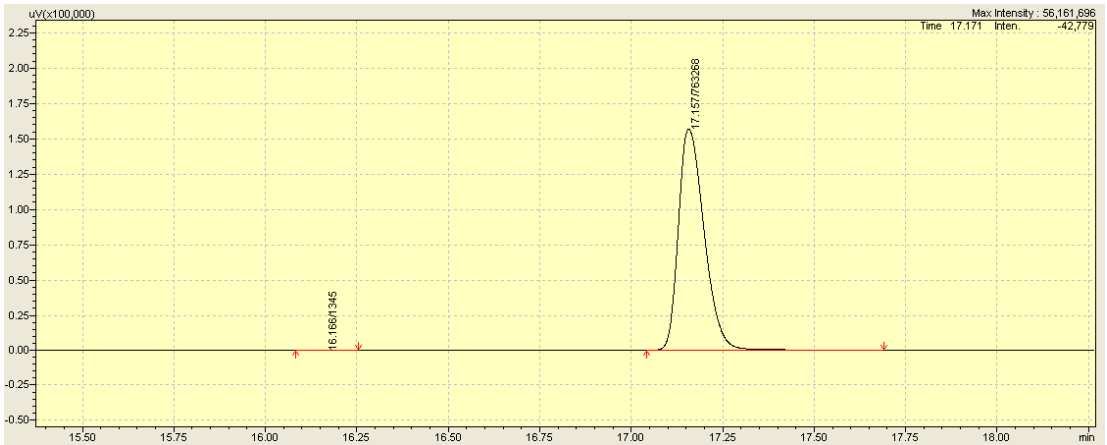

Entry 15 in Table 2
